# Supplementary material for: Predicting breast cancer drug response using a multiple-layer cell line drug response network model
Source: PubMed Central journal article supplement (PMC8166022; doi:10.1186/s12885-021-08359-6), 2021-05-31

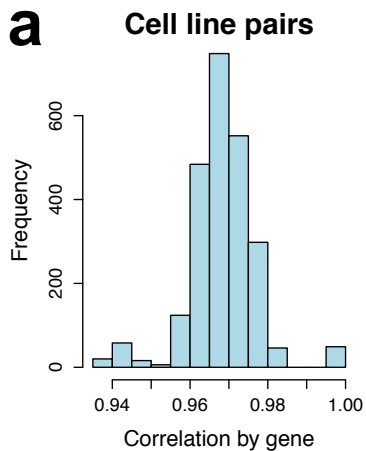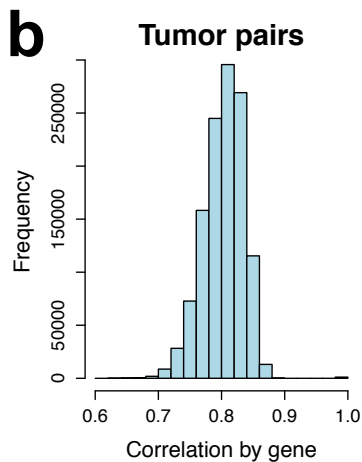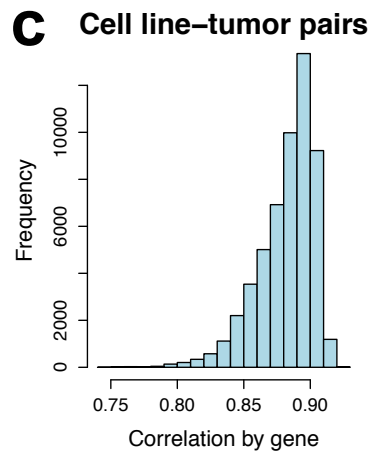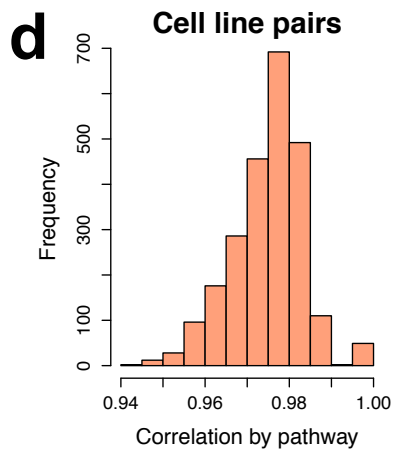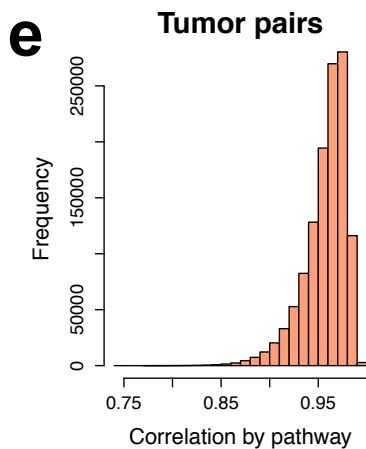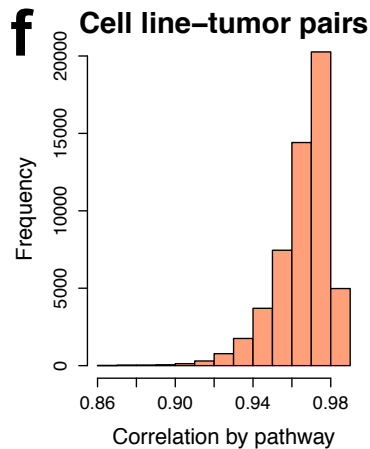

Supplement: 12885_2021_8359_MOESM3_ESM.pdf [file 12885_2021_8359_MOESM3_ESM.pdf]
